# Supplementary material for: Depression and anxiety in parents of children with intellectual and developmental disabilities: A systematic review and meta-analysis
Source: PubMed Central journal article supplement (PMC6667144; doi:10.1371/journal.pone.0219888), 2019-07-30
Supplement: pone.0219888.s002.pdf [file pone.0219888.s002.pdf]

**S1 Table 1. Database search terms**

| Category                      | Search Terms                                                                                                                                                                                                                                                                                                                                                                                                                                                                   |
|-------------------------------|--------------------------------------------------------------------------------------------------------------------------------------------------------------------------------------------------------------------------------------------------------------------------------------------------------------------------------------------------------------------------------------------------------------------------------------------------------------------------------|
| <b>IDD</b>                    | “intellectual disability”, “intellectual impairment”, “learning disability”, “developmental disability”, “mental retardation”, “learning difficulty”, “mental deficiency”, “intellectual deficiency”, “fragile X syndrome”, “Down syndrome”, “fetal alcohol syndrome”, “autism”, “Asperger syndrome”, “Rett syndrome”, “childhood disintegrative disorder”, “Heller’s syndrome”, “pervasive developmental disorder” “cerebral palsy”, “traumatic brain injury”, “spina bifida” |
| <b>Child</b>                  | “child”, “kid”, “adolescent”, “teenager”, “youth”                                                                                                                                                                                                                                                                                                                                                                                                                              |
| <b>Parent</b>                 | “mother”, “father”, “carer”, “caregiver”, “parent”, “family”                                                                                                                                                                                                                                                                                                                                                                                                                   |
| <b>Depression and Anxiety</b> | “depression”, “anxiety”, “depressive”, “depressive disorder”, “depressive symptom”, “mood disorder”, “affective disorder”, “unipolar depression”, “generalised anxiety disorder”, “anxiety disorder”                                                                                                                                                                                                                                                                           |

**S1 Table 2. Full MEDLINE database search strategy**

|   |                                                                                                                                                                                                                                                                                                                                                                                                                                                                                                                                                                                                                                                                                                                       |
|---|-----------------------------------------------------------------------------------------------------------------------------------------------------------------------------------------------------------------------------------------------------------------------------------------------------------------------------------------------------------------------------------------------------------------------------------------------------------------------------------------------------------------------------------------------------------------------------------------------------------------------------------------------------------------------------------------------------------------------|
| 1 | (intellectual* dis* or intellectual* impair* or learning dis* or developmental dis* or mental retardation or learning difficult* or mental deficiency or intellectual* deficien* or fragile X syndrome or down* syndrome or f?etal alcohol syndrome or autism or autistic or asperger* or Rett syndrome or childhood dis?integrative disorder or pervasive developmental disorder or Heller* syndrome or cerebral palsy or traumatic brain injury or spina bifida).mp. [mp=title, abstract, original title, name of substance word, subject heading word, floating sub-heading word, keyword heading word, protocol supplementary concept word, rare disease supplementary concept word, unique identifier, synonyms] |
| 2 | (child* or adolescent* or teenager* or youth*).mp. [mp=title, abstract, original title, name of substance word, subject heading word, floating sub-heading word, keyword heading word, protocol supplementary concept word, rare disease supplementary concept word, unique identifier, synonyms]                                                                                                                                                                                                                                                                                                                                                                                                                     |
| 3 | (mother* or father* or carer* or caregiver* or parent* or famil*)*).mp. [mp=title, abstract, original title, name of substance word, subject heading word, floating sub-heading word, keyword heading word, protocol supplementary concept word, rare disease supplementary concept word, unique identifier, synonyms]                                                                                                                                                                                                                                                                                                                                                                                                |
| 4 | (depression or depressed or anxiety or depressive or depressive disorder or depressive symptom* or mood disorder or affective disorder or uni?polar depression or generali?ed anxiety disorder or anxiety disorder or anxiety symptom*).mp. [mp=title, abstract, original title, name of substance word, subject heading word, floating sub-heading word, keyword heading word, protocol supplementary concept word, rare disease supplementary concept word, unique identifier, synonyms]                                                                                                                                                                                                                            |
| 5 | 1 and 2 and 3 and 4                                                                                                                                                                                                                                                                                                                                                                                                                                                                                                                                                                                                                                                                                                   |
