# Supplementary material for: Depression and anxiety in parents of children with intellectual and developmental disabilities: A systematic review and meta-analysis
Source: PubMed Central journal article supplement (PMC6667144; doi:10.1371/journal.pone.0219888), 2019-07-30
Supplement: pone.0219888.s003.pdf [file pone.0219888.s003.pdf]

**S2 Table. Association between parenting a child with IDD and depression and anxiety, by study characteristics**

|                        |                   | Association of caring for a child with IDD and depression/anxiety |          |      |          |          |      |
|------------------------|-------------------|-------------------------------------------------------------------|----------|------|----------|----------|------|
|                        |                   | Depression                                                        |          |      | Anxiety  |          |      |
|                        |                   | Positive                                                          | Negative | Null | Positive | Negative | Null |
| <b>Overall</b>         |                   | 95%                                                               | 0%       | 5%   | 90%      | 0%       | 10%  |
| <b>Disability Type</b> | Autism            | 83%                                                               | 0%       | 17%  | 100%     | 0%       | 0%   |
|                        | CP                | 100%                                                              | 0%       | 0%   | 80%      | 0%       | 20%  |
|                        | Multiple          | 100%                                                              | 0%       | 0%   | 0%       | 0%       | 0%   |
|                        | ID                | 100%                                                              | 0%       | 0%   | 100%     | 0%       | 0%   |
| <b>Region</b>          | Europe            | 100%                                                              | 0%       | 0%   | 80%      | 0%       | 20%  |
|                        | North America     | 100%                                                              | 0%       | 0%   | 0%       | 0%       | 0%   |
|                        | East Asia/Pacific | 67%                                                               | 0%       | 33%  | 50%      | 0%       | 50%  |
|                        | Middle East       | 50%                                                               | 0%       | 50%  | 100%     | 0%       | 0%   |
|                        | South Asia        | 100%                                                              | 0%       | 0%   | 100%     | 0%       | 0%   |
| <b>Sample Size</b>     | 0-99              | 75%                                                               | 0%       | 25%  | 50%      | 0%       | 50%  |
|                        | 100-199           | 100%                                                              | 0%       | 0%   | 100%     | 0%       | 0%   |
|                        | 200-499           | 100%                                                              | 0%       | 0%   | 100%     | 0%       | 0%   |
|                        | >500              | 100%                                                              | 0%       | 0%   | 0%       | 0%       | 0%   |
| <b>Risk of Bias</b>    | Low               | 0%                                                                | 0%       | 0%   | 0%       | 0%       | 0%   |
|                        | Medium            | 100%                                                              | 0%       | 0%   | 89%      | 0%       | 11%  |
|                        | High              | 50%                                                               | 0%       | 50%  | 100%     | 0%       | 0%   |
