# Supplementary material for: Depression and anxiety in parents of children with intellectual and developmental disabilities: A systematic review and meta-analysis
Source: PubMed Central journal article supplement (PMC6667144; doi:10.1371/journal.pone.0219888), 2019-07-30
Supplement: pone.0219888.s004.pdf [file pone.0219888.s004.pdf]

**S3 Table. Factors associated with depression in parents of a child with IDD**

| Variables                                 | Study                   | Association                                       | P-value      | % Positive |
|-------------------------------------------|-------------------------|---------------------------------------------------|--------------|------------|
| <b>Characteristics of Child</b>           |                         |                                                   |              |            |
| Age of child                              | Almansour, 2013         | No association                                    | 0.54         | 0/4 (0%)   |
|                                           | Cantwell, 2015          | No association                                    | Not reported |            |
|                                           | Unsal-Delialioglu, 2009 | No association                                    | >0.05        |            |
|                                           | Yang, 2016              | No association                                    | >0.05        |            |
| Disability severity                       | Altindag, 2007          | Positive correlation with worse CP motor function | <0.001       | 7/9 (78%)  |
|                                           | Basaran, 2013           | Positive correlation with worse CP motor function | <0.01        |            |
|                                           | Gong, 2015              | Positive correlation with autism severity         | Not reported |            |
|                                           | Ingersoll, 2011         | Positive correlation with autism severity         | <0.01        |            |
|                                           | Kaya, 2010              | No correlation with CP motor function             | >0.05        |            |
|                                           | Ones, 2005              | No correlation with CP motor function             | 0.52         |            |
|                                           | Unsal-Delialioglu, 2009 | Positive correlation with speech defects          | 0.036        |            |
|                                           | Yilmaz, 2013            | Positive correlation with worse CP motor function | <0.001       |            |
|                                           | Yang, 2016              | Positive correlation with autism severity         | Not reported |            |
| Time since diagnosis                      | Almansour, 2013         | No association                                    | 0.19         | 0/1 (0%)   |
| <b>Characteristics of Parent</b>          |                         |                                                   |              |            |
| Relation to child (i.e. mother or father) | Almansour, 2013         | No association                                    | 0.99         | 4/5 (80%)  |
|                                           | Gong, 2015              | Higher levels of maternal depression              | <0.0001      |            |
|                                           | Norlin, 2013            | Higher levels of maternal depression              | <0.01        |            |
|                                           | Olsson, 2008            | Higher levels of maternal depression              | <0.05        |            |
|                                           | Yang, 2016              | Higher levels of maternal depression              | <0.0001      |            |
| Parent age                                | Almansour, 2013         | No association                                    | 0.53         | 0/3 (0%)   |
|                                           | Ingersoll, 2011         | No association                                    | >0.05        |            |
|                                           | Yilmaz, 2013            | No association                                    | >0.05        |            |

| <b>Variables</b>            | <b>Study</b>            | <b>Association</b>                                                                              | <b>P-value</b> | <b>% Positive</b> |
|-----------------------------|-------------------------|-------------------------------------------------------------------------------------------------|----------------|-------------------|
| Education level             | Almansour, 2013         | No association                                                                                  | 0.07           | 2/6 (33%)         |
|                             | Gong, 2015              | Negative correlation with education level                                                       | <0.05          |                   |
|                             | Ingersoll, 2011         | No association                                                                                  | >0.05          |                   |
|                             | Unsal-Delialioglu, 2009 | No association                                                                                  | >0.05          |                   |
|                             | Yang, 2016              | Negative correlation with education level                                                       | <0.01          |                   |
|                             | Yilmaz, 2013            | No association                                                                                  | >0.05          |                   |
| Number of children          | Almansour, 2013         | No association                                                                                  | 0.49           | 0/3 (0%)          |
|                             | Cantwell, 2015          | No association                                                                                  | Not reported   |                   |
|                             | Yilmaz, 2013            | No association                                                                                  | >0.05          |                   |
| Number of children with IDD | Almansour, 2013         | Higher levels in cases with 3 or more autistic children                                         | 0.003          | 1/1 (100%)        |
| Parenting stress            | Gong, 2015              | Positive correlation with parental stress                                                       | <0.01          | 3/3 (100%)        |
|                             | Ingersoll, 2010         | Positive correlation with parental stress                                                       | <0.05          |                   |
|                             | Yang, 2016              | Positive correlation with parental stress                                                       | <0.01          |                   |
| Household income            | Gong, 2015              | Negative correlation with income level                                                          | <0.05          | 4/5 (80%)         |
|                             | Norlin, 2013            | Positive correlation with economic risk                                                         | <0.01          |                   |
|                             | Unsal-Delialioglu, 2009 | Negative correlation with income level                                                          | 0.007          |                   |
|                             | Yang, 2016              | Negative correlation with income level                                                          | <0.01          |                   |
|                             | Yilmaz, 2013            | No association                                                                                  | >0.05          |                   |
| Stigma                      | Cantwell, 2015          | Positive correlation with stigma                                                                | 0.04           | 1/1 (100%)        |
| Marital quality             | Norlin, 2013            | Negative correlation with marital quality                                                       | <0.001         | 1/1 (100%)        |
| Marital status              | Ingersoll, 2010         | Negative correlation with marital status (i.e. those married have reduced levels of depression) | <0.01          | 1/1 (100%)        |
