# Supplementary material for: Depression and anxiety in parents of children with intellectual and developmental disabilities: A systematic review and meta-analysis
Source: PubMed Central journal article supplement (PMC6667144; doi:10.1371/journal.pone.0219888), 2019-07-30
Supplement: pone.0219888.s005.pdf [file pone.0219888.s005.pdf]

**S4 Table. Risk of bias, by IDD**

|                                | Q1. Appropriate study design | Q2. Adequate sample size | Q3. Acceptable response rate | Q4. Reliable disability measure | Q5. Reliable outcome measure | Q6. Confounders analysed | Q7. Confidence intervals presented | Q8. Comparable cases and controls | Q9. Clearly defined cases and controls | Risk of Bias |
|--------------------------------|------------------------------|--------------------------|------------------------------|---------------------------------|------------------------------|--------------------------|------------------------------------|-----------------------------------|----------------------------------------|--------------|
| <b>Autism</b>                  |                              |                          |                              |                                 |                              |                          |                                    |                                   |                                        |              |
| Almansour, 2013                |                              |                          |                              |                                 |                              |                          |                                    |                                   |                                        | Medium       |
| Gong, 2015                     |                              |                          |                              |                                 |                              |                          |                                    |                                   |                                        | Medium       |
| Ingersoll, 2010                |                              |                          |                              |                                 |                              |                          |                                    |                                   |                                        | Medium       |
| Lai, 2015                      |                              |                          |                              |                                 |                              |                          |                                    |                                   |                                        | Medium       |
| Riahi, 2010                    |                              |                          |                              |                                 |                              |                          |                                    |                                   |                                        | High         |
| Yang, 2015                     |                              |                          |                              |                                 |                              |                          |                                    |                                   |                                        | Medium       |
| <b>Cerebral Palsy</b>          |                              |                          |                              |                                 |                              |                          |                                    |                                   |                                        |              |
| Altindag, 2007                 |                              |                          |                              |                                 |                              |                          |                                    |                                   |                                        | Medium       |
| Basaran, 2013                  |                              |                          |                              |                                 |                              |                          |                                    |                                   |                                        | Medium       |
| Cheshire, 2010                 |                              |                          |                              |                                 |                              |                          |                                    |                                   |                                        | Medium       |
| Kaya, 2010                     |                              |                          |                              |                                 |                              |                          |                                    |                                   |                                        | Medium       |
| Ones, 2005                     |                              |                          |                              |                                 |                              |                          |                                    |                                   |                                        | Medium       |
| Unsal-Delialioglu, 2009        |                              |                          |                              |                                 |                              |                          |                                    |                                   |                                        | Medium       |
| Yilmaz, 2013                   |                              |                          |                              |                                 |                              |                          |                                    |                                   |                                        | Medium       |
| <b>Multiple: Combined</b>      |                              |                          |                              |                                 |                              |                          |                                    |                                   |                                        |              |
| Cantwell, 2015                 |                              |                          |                              |                                 |                              |                          |                                    |                                   |                                        | Medium       |
| Norlin, 2013                   |                              |                          |                              |                                 |                              |                          |                                    |                                   |                                        | Medium       |
| Olsson, 2008                   |                              |                          |                              |                                 |                              |                          |                                    |                                   |                                        | Medium       |
| <b>Multiple: Disaggregated</b> |                              |                          |                              |                                 |                              |                          |                                    |                                   |                                        |              |
| Lach, 2009                     |                              |                          |                              |                                 |                              |                          |                                    |                                   |                                        | Medium       |
| Muammer, 2013                  |                              |                          |                              |                                 |                              |                          |                                    |                                   |                                        | High         |
| <b>Intellectual Disability</b> |                              |                          |                              |                                 |                              |                          |                                    |                                   |                                        |              |
| Gogoi, 2017                    |                              |                          |                              |                                 |                              |                          |                                    |                                   |                                        | Medium       |
| <b>Total</b>                   |                              |                          |                              |                                 |                              |                          |                                    |                                   |                                        |              |
| Low Risk                       | 9 (47%)                      | 15 (79%)                 | 4 (21%)                      | 14 (74%)                        | 19 (100%)                    | 0 (0%)                   | 0 (0%)                             | 11 (61%)                          | 10 (56%)                               | 0 (0%)       |
| Medium Risk                    | 10 (53%)                     | 3 (16%)                  | 2 (11%)                      | 5 (26%)                         | 0 (0%)                       | 0 (0%)                   | 19 (100%)                          | 7 (39%)                           | 8 (44%)                                | 17 (89%)     |
| High Risk                      | 0 (0%)                       | 1 (5%)                   | 13 (68%)                     | 0 (0%)                          | 0 (0%)                       | 19 (100%)                | 0 (0%)                             | 0 (0%)                            | 0 (0%)                                 | 2 (11%)      |
