# Supplementary material for: Depression and anxiety in parents of children with intellectual and developmental disabilities: A systematic review and meta-analysis
Source: PubMed Central journal article supplement (PMC6667144; doi:10.1371/journal.pone.0219888), 2019-07-30

**S1 Fig. Standardised mean difference in anxiety scores between parents of children with autism and the control group**

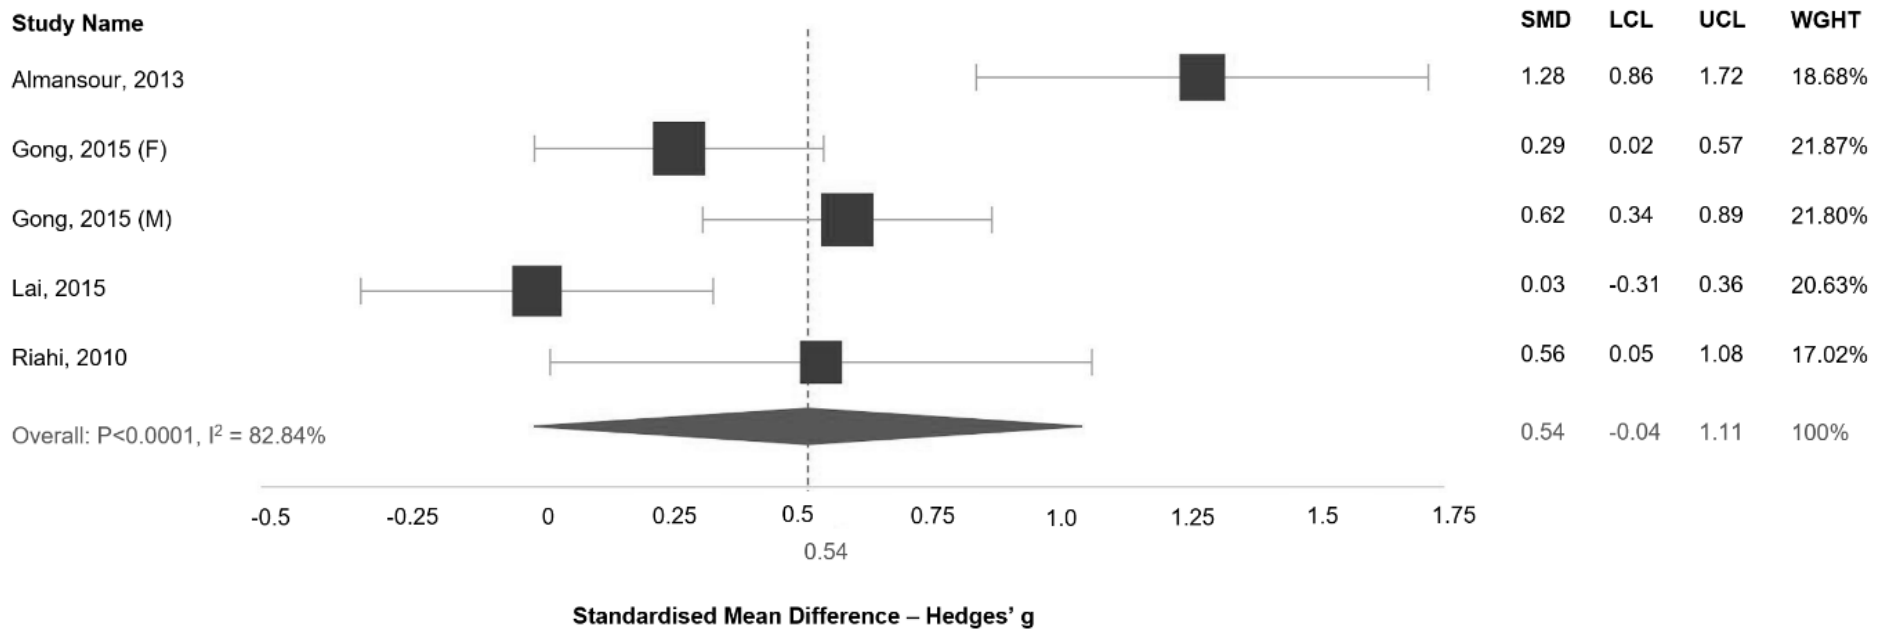

Supplement: pone.0219888.s006.pdf [file pone.0219888.s006.pdf]
